# Supplementary material for: Field Metabolic Rate and PCB Adipose Tissue Deposition Efficiency in East Greenland Polar Bears Derived from Contaminant Monitoring Data
Source: PLoS One. 2014 Aug 7;9(8):e104037. doi: 10.1371/journal.pone.0104037 (PMC4125222; doi:10.1371/journal.pone.0104037)
Supplement: File S2 — Model code – NetLogo file. (NLOGO) [file pone.0104037.s005.nlogo]

; Model version: SUB2_1 updatedparamentrs
; 
; Manuscript authors: Viola Pavlova, Jacob Nabe-Nielsen, Rune Dietz, Jens-Christian Svenning, Katrin Vorkamp, Frank Farso Riget, Volker Grimm, Sonne Christian, Letcher Robert
;
; created 1.10.2012  in NetLogo 4.1
; updated 10.3.2013 :  Volker in Net Logo 5.0.3
; updated 20.03.2013 and 01.05.2013:  Viola
; updated 18.1.2014:  Viola in NetLogo 4.1.3

;[[references to ODD, Supporting Information S4]]


;  POLAR BEAR VARIABLES

;extensions [profiler]

turtles-own
[
  age
  weight ;[[= W in the ODD]]
  status ; female: 0 no cubs, 1 with cubs, 2 with yearlings, 5 males
  energy; [[= EA for males & single females, EFC for females with cubs, EFY for females with yearlings]]
  BB ; PCB body burden
  sex; females 1, males 0
  SA;random number for age
  SS;random number for seal sex
  SARN;random number for seal age class
  ofno;offspring number 
  BBc ;cont.body burde in cub;
  BBy;cont. body burden in yearling
  Ey; energy demand of a yearling
  fat; blubber percentage 
  Ic; [[ = Ic, updated in a loop]
  RN;random number
  p; pregnant? 0 = not,  1=yes 
  days1; number of days of cub 1 survival
  days2; number of days of cub 2 survival
  epsilon ;
]

; GLOBAL PARAMETERS

globals
[
  lambda
  year
  T_bl;total blubber
  C_Seal;seal contamination
  G;energy gain from one seal
  Sweight; weight of each hunted seal
  seal1986; seal contamination for 1986 
  seal1987
  seal1988
  seal1989
  seal1990
  seal1991
  seal1992
  seal1993
  seal1994
  seal1995
  seal1996
  seal1997
  seal1998
  seal1999
  seal2000
  seal2001
  seal2002
  seal2003
  seal2004
  seal2005
  seal2006
  seal2007
  seal2008
  seal2009
  seal2010
  
  death  ;    mortality 
  NUMBERS
  f_A; field metabolic factor of older bears value 1-10
  f_Y;field metabolic factor of yearlings value 1-13
  initialpopulation
  sigmay; yearling survival 
  sigmac; cub survival   
  beta0; breeding probability, 0.437
  beta12; breeding probability, 0.104  
  mcc; cub milk consumption 469; g/day 
  Emc; energy in milk for cubs 16.9;kJ/g 
  Emy; energy in milk for yearlings 12; kJ/g 
  mcy; yearling milk consumption 131; g/day 
  Wy; 95;yearling weight kg
  Wsm; 54.5 ; male seal growth equation parameter
  asm; 0.04247 ; male seal growth equation parameter
  bsm; 0.16599 ; male seal growth equation parameter
  Wsf; 48.1  ; female seal growth equation parameter
  asf; 0.1114 ; female seal growth equation parameter
  bsf; 0.2583 ; female seal growth equation parameter
  a_Tbl; 0.365; seal blubber estimation parameter
  b_Tbl ;1.564; seal blubber estimation parameter
  Es; 37.8 kJ/g, (9 kcal/g) calories obtained from a gram of seal 
  kappa; recalculate kcal to kilojoules
  hsa ; hunting prefernce to adult seal 
  hsp ; hunting prefernce to seal pup
  FmilkC; 0.275
  FmilkY; 0.206 
  rho; 0.67; ratio contaminant in milk and female
  Ac; 0.23, assimilation cub 
  Ay; 0.23 assimilation yearling
  AA; 10 assimilation adult
  mu_sm ; 0.13; mortality subadult male
  mu_m; 0.067; mortality adult male
  mu_sf; 0.084; mortality subadult female
  mu_f; 0.053; mortality adult female
  pi_1cub; 0.276; probability of single cub in litter (as opposed to two)
  Ff; 0.28,  fat female
  Fpf; 0.4; pregnant female
  Ffcub; 0.23;female with cubs
  Ffyrl; 0.28; female with yrl
  Fm; 0.28; fat male
  Wpf; 371; weight pregnant female
  Wfc; 161; weight female with cubs
  Wbm; 389; mael bear growth equation parameter 
  kbm; 0.303; male bear growth equation parameter
  Abm; -1.245 ; male bear growth equation parameter
  Wbf; 185; female bear growth equation parameter
  kbf; 0.58;female bear growth equation parameter
  Abf; -0.578;female bear growth equation parameter
  
  Fc; 0.11; fat cub
  Fy; 0.28; fat yearling
  Wc; 45; weight cub
  ;outfile
  ;output-name
  numberruns; number of runs
  

  
]


;-------------------------------------------SETUP------------------------------------------------------------

to setup

  ;; (for this model to work with NetLogo's new plotting features,
  ;; __clear-all-and-reset-ticks should be replaced with clear-all at
  ;; the beginning of your setup procedure and reset-ticks at the end
  ;; of the procedure.)
 clear-all
 reset-ticks 

set seal1986 [
298.6622122
258.4424255
329.9668719
295.5449218
288.8138783
301.8631965
310.4877937
400.8369598
423.8512401
481.5520232
661.9916265
614.7106154]


set seal1987 [
 288.691589
 249.814511
 318.9511651
 285.6783671
 279.1720346
 291.7857107
  300.122382
  387.4553062
  409.7012712
  465.4757551
  639.891512
  594.1889435]

set seal1988 [
279.0538279
241.4746332
308.3032098
276.1412002
269.852077
282.0446546
290.103012
374.5203893
396.0236889
449.9361817
618.529194
574.3523729]

set seal1989[
269.7378165
233.4131762
298.0107288
266.9224248
260.8432594
272.6287966
280.4181316
362.0172954
382.8027228
434.9153858
597.8800416
555.1780319]

set seal1990[
260.7328134
225.6208451
288.0618549
258.0114116
252.1351948
263.5272802
271.0565739
349.9316083
370.0231291
420.3960484
577.9202463
536.6438125]

set seal1991[
252.0284359
218.0886554
278.445117
249.3978861
243.7178426
254.7296115
262.007545
338.2493932
357.670173
406.3614286
558.6267944
518.7283446]

set seal1992[
243.6146478
210.8079225
269.149427
241.071917
235.5814977
246.2256465
253.2606115
326.9571804
345.7296114
392.7953445
539.9774405
501.4109718]

set seal1993[
235.481748
203.7702516
260.1640669
233.0239044
227.7167787
238.0055804
244.8056881
316.04195
334.187677
379.6821543
521.9506819
484.6717271]

set seal1994[
227.6203591
196.9675282
251.4786766
225.2445689
220.1146178
230.0599352
236.6330263
305.4911168
323.0310616
367.0067386
504.5257337
468.4913099]

set seal1995[
220.0214171
190.3919089
243.0832418
217.7249409
212.7662496
222.3795497
228.7332028
295.2925155
312.2469019
354.7544825
487.6825049
452.8510644]

set seal1996[
212.6761603
184.0358119
234.9680826
210.4563503
205.6632013
214.9555683
221.0971093
285.4343872
301.8227636
342.9112592
471.4015751
437.7329572]

set seal1997[
205.5761196
177.8919087
227.1238421
203.4304164
198.7972832
207.7794312
213.7159413
275.9053654
291.7466277
331.4634134
455.6641725
423.1195572]

set seal1998[
198.7131087
171.9531152
219.5414759
196.6390382
192.1605789
200.8428643
206.5811883
266.6944632
282.0068763
320.3977457
440.4521517
408.994015]

set seal1999[
192.0792144
166.2125841
212.2122416
190.0743853
185.7454361
194.1378697
199.6846238
257.7910603
272.5922795
309.7014973
425.7479733
395.3400439]

set seal2000[
185.6667879
160.6636965
205.1276885
183.7288886
179.5444583
187.6567165
193.0182962
249.1848911
263.4919822
299.3623355
411.5346833
382.1419008]

set seal2001[
179.4684357
155.3000545
198.2796481
177.5952318
173.5504956
181.391932
186.5745192
240.8660327
254.6954919
289.3683392
397.7958938
369.3843682]


set seal2002[
173.477011
150.1154739
191.6602246
171.6663427
167.7566371
175.3362927
180.345863
232.8248934
246.192666
279.7079852
384.5157639
357.0527367]

set seal2003[
167.6856058
145.1039767
185.2617858
165.9353853
162.1562024
169.4828167
174.3251461
225.0522017
237.9737009
270.3701353
371.6789816
345.1327878]

set seal2004[
162.0875424
140.2597848
179.0769543
160.3957517
156.7427342
163.8247547
168.5054264
217.5389958
230.02912
261.3440227
359.2707461
333.6107778]

set seal2005[
156.6763663
135.5773127
173.098599
155.0410549
151.5099907
158.3555831
162.8799939
210.2766128
222.3497632
252.6192404
347.2767506
322.4734219]

set seal2006[
151.4458385
131.0511616
167.3198267
149.8651208
146.4519386
153.0689958
157.4423624
203.2566793
214.9267762
244.1857287
335.6831659
311.7078786]

set seal2007[
146.3899281
126.6761128
161.7339746
144.8619815
141.5627459
147.9588974
152.1862624
196.4711012
207.7516003
236.0337637
324.4766248
301.3017352]

set seal2008[
141.5028056
122.4471219
156.3346021
140.0258684
136.8367755
143.019396
147.1056334
189.9120547
200.8159625
228.1539462
313.644206
291.2429934]

set seal2009[
136.7788362
118.3593127
151.1154839
135.3512054
132.2685781
138.2447963
142.1946176
183.5719773
194.111866
220.5371908
303.1734197
281.5200555]

set seal2010[
132.2125731
114.4079722
146.0706021
130.8326028
127.8528867
133.6295932
137.4475525
177.4435589
187.6315809
213.1747153
293.0521931
272.1217108]


  set year 1950
  set initialpopulation 2000
  set numberruns 60
  
  ;file-setup

  ;::::::::::::::::::::::::::::::::::::::::::::::::::::::::::::::::::set parameter values:::::::::::::::::::::::::::::::::::::::

  ; OffspringSurvival

  set sigmay 0.916
  set sigmac 0.57      
  set beta0 0.437
  set beta12 0.104  

  ; SetEnergyRequirement
  
  set f_A 6
  set f_Y 11
  set mcc 469; g/day consumtion
  set Emc 16.9;kJ/g energy in milk
  set Emy 12; kJ/g energy in milk
  set mcy 131; g/day consumtion
  set Wy 90;105; kg 90

  ;Feed
  set hsa 18
  set hsp 56 
  set Wsm 54.5 set asm 0.04247 set bsm 0.16599
  set Wsf 48.1 set asf 0.1114  set bsf 0.2583
  set a_Tbl 0.365
  set b_Tbl 1.564
  set Es 37.8;kJ/g = 9 kcal/g calories obtained from gram of seal 

  ;LactationTransfer

  set FmilkC 0.275
  set FmilkY 0.206 
  set rho 0.67
  set Ac 0.23 
  set Ay 0.3
  set AA 0.1
  
  ;DieAndBreed
   
  set mu_sm  0.13; mortality subadult male
  set mu_m 0.067; mortality adult male
  set mu_sf 0.084; mortality subadult female
  set mu_f 0.053; mortality adult female
  set pi_1cub 0.276; probability of single cub in litter (as opposed to two)

  ;UpdateBlubber ; proportion of fat on a polar bear

  set Ff 0.28
  set Fpf 0.4; pregnant female
  set Ffcub 0.23;female with cubs
  set Ffyrl 0.28; female with yrl
  set Fm 0.28

  ; UpdateWeight

  set Wpf 371
  set Wfc 161
  
  set Wbm 389 
  set kbm 0.303  
  set Abm -1.245 
  set Wbf 185 
  set kbf 0.58  
  set Abf -0.578

  ;updateBB
  set Fc 0.11
  set Fy 0.28
  set Wc 43.5; changed from 43.5 
  
  crt initialpopulation 
  [ 
    fd random 9 
    rt random 30
  ]

 ;INITIALILZATION of Turtles

  ask turtles
  [
    set age 2 + random 19
    set Ic 0
    set sex random 2; 0male   1 female
    
    ;ASSIGN INITIAL STATUS:
    ifelse sex = 1 
    [
      set status random 3 
      if status = 0 [ set p random 2] 
      if status = 1 [ set ofno 1 + random 2] 
      if status = 2 [ set ofno 1 + random 2]
    ] 
    [
      set status 5 
    ]; males don't breed status = 5
    
    ;ASSIGN INITIAL WEIGHT:
    
    ifelse sex = 0;male
    [
      set  weight Wbm * ( 1 - exp(- kbm * ( age - Abm))) ^ 3
    ];von bertallanfy growth for  males, 
    [
      set  weight Wbf * ( 1 - exp(- kbf * ( age - Abf))) ^ 3
    ]; von bertalanffy growth for females for 
    
    UpdateBlubber 
  ]
  
  reset-ticks
  
end ; setup


;++++++++++++++++++++++++++++++++++++++++++++++++++++++++++++++++++++++++++++++++++++++++++++++++++++++++++++++++++++++++++++++++++++++++++++;
;+++++++++++++++++++++++++++==GO==+++++++++++++++++++++++++++++++++++++++++++++++++++++++++++++++++++++++++++++++++++++++++++++++++++++++++++;
;++++++++++++++++++++++++++++++++++++++++++++++++++++++++++++++++++++++++++++++++++++++++++++++++++++++++++++++++++++++++++++++++++++++++++++;

to go

  
  tick

  ask turtles [set Ic 0]
  
  ;--------------------------------------------SUBMODULES----------------------------------------------

  ask turtles with [sex = 1] [OffspringSurvival];which females will be pregnant this year and whose cubs will die and when

  UpdateBlubber
  UpdateWeight
   
  ask turtles[SetEnergyRequirement]; calculate energy requirments for every bear according to the weight
     
    
  ask turtles [Feed]; calculate hunting of seals


  ask turtles [LactationTransfer]; for lactating females
  
  ask turtles [PopulationDynamics]; natural mortality and natality

  ask turtles[UpdateAge] ; get older

  UpdateBlubber
  UpdateWeight  

;FILE OUTPUT:
;  if year > 1985 
;  [
;    ask turtles 
;    [
;      set RN random 10
;      if RN = 1 
;      [
;        file-write-line
;      ]
;    ] 
;  ]  ;a sample of 1/5 of population writes file  

  set year year + 1 ;yearcounter

  
  set NUMBERS count turtles

  set lambda  (count turtles / initialpopulation) ^ ( 1 / ticks)

  
 
  if ticks = numberruns [stop]

  
end ; go


;/////////////////////////////////////////////////SUBMODULES-DETAILS/////////////////////////////////////////////


;-------------------------------------------OffspringSurvival--------------------------------------

to OffspringSurvival ; turtle procedure
  
  if age < 5 
  [
    set status 0 
    set p 0
  ]
  
  set RN random-float 1 
  
  if status = 2 and ofno = 1 
    [
      set p 0 
      ifelse RN < sigmay
      [ 
        set days1 365 
        set days2 0
      ]
      [ 
        set ofno 0 
        set days1 random 366 + 1 
        set days2 0
      ]
    ]  
  
  if status = 2 and ofno = 2 
    [
      set p 0 
      if RN < (1 - sigmay) ^ 2     
      [ 
        set ofno 0 
        set days1 random 366 + 1 
        set days2 random 366 + 1  
      ]
  
      if  ( 1 - sigmay) ^ 2 < RN and RN < 1 - (sigmay ^ 2)  
      [  
        set ofno 1 
        set days1 random 366 + 1 
        set days2 365
      ]
      
      if RN > (1 - (sigmay ^ 2) ) 
      [
        set ofno 2 
        set days1 365 
        set days2 365
      ] 
    ]               
  
  
  if status = 1 and ofno = 1 
    [
      set p 0 
      ifelse RN <  sigmac 
      [ 
        set days1 365 
        set days2 0
      ]
      [ 
        set ofno 0 
        set days1 random 366 + 1 
        set days2 0
      ]
    ]    
  
  
  if status = 1 and ofno = 2 
    [
      set p 0 
      if RN < (1 - sigmac) ^ 2     
      [  
        set ofno 0 
        set days1 random 366 + 1 
        set days2 random 366 + 1  
      ]
      
      if  ( 1 - sigmac ) ^ 2 < RN and RN < 1 - (sigmac  ^ 2)  
        [ 
          set ofno 1 
          set days1 random 366 + 1 
          set days2 365
        ]
      
      if RN > ( 1 - (sigmac  ^ 2))  
        [  
          set ofno 2 
          set days1 365 
          set days2 365
        ] 
    ]                     
  
  
  ; who will get pregnant this year?
  if age > 5 and status = 0 and p = 0 
    [ 
      ifelse RN <  beta0 
      [ 
        set p 1 
        set BBc 0 
        set BBy 0
      ]
      [ 
        set p 0 
        set BBc 0 
        set BBy 0
      ]
    ]
  
  set RN random-float 1
  
  if status = 1 and ofno = 0 
    [  
      set BBc 0 
      set BBy 0 
      if RN <  beta12  
      [ 
        set p 1
      ] 
    ]
  
  if status = 2 and ofno = 0 
    [ 
      set BBc 0 
      set BBy 0 
      if RN <  beta12  
      [ 
        set p 1
      ] 
    ]
  
end


;----------------------------------SET ENERGY------------------------------------------------------------

to SetEnergyRequirement ; turtle procedure
  
  ;calculate weight dependent energy requirment of a polar bear 

  set energy 365 * kappa * f_A * 70 * (weight) ^ 0.75; [[eq.(S4)]]  
 
 ; adjust for females
  
  if sex = 1 and status = 1 
  [
    set energy energy + Emc * mcc * (days1 + days2)     ;[[eq.(S5)]]
  ]; adjusted for cub milk consumption [kJ]
  
  if sex = 1 and status = 2 
  [
    set energy energy + Emy *  mcy * (days1 + days2)       ;[[eq.(S6)]]
    set Ey 365 * kappa * f_Y * 70 * ( Wy ) ^ 0.75 -  Emy * mcy * 365 ;[[eq.(S7)]]
    set epsilon Ey / energy                                        ;[[eq.(S8)]]
  ]

end


;---------------------------------------------TO FEED----------------------------------------------------

to Feed ; turtle procedure

  if energy > 90000 
  [
    
    loop  ; eat seals until energy demands of the bear are met
    [    
      set SARN random 100
      
      ; determine age class of seals to eat and select seal age SA randomly within
      ; this class:
      
      if SARN <= hsa 
      [ 
        set SA (3 + random 17) 
        if SA >= 11 
        [
          set SA 11 
        ] 
      ];18%
      
      if hsa < SARN and SARN <= (100 - hsp) 
      [
        set SA (1 + random 2)
      ];26%
      
      if  SARN > (100 - hsp) 
      [
        set SA 0
      ]       ; select age of seal 56%
     
      
      set SS random 2      ;select seal sex sex = 1 female;sex = 0 male
      
      
      ifelse SS = 0 ;calculate  weight of seal 
      [
        set Sweight Wsm * ((1 - exp(- asm * (SA + 0.61))) ^ bsm);[[eq.(S1)]]
      ]; Von Bertalanffy
      [
        set Sweight Wsf * ((1 - exp(- asf * (SA + 0.61))) ^ bsf);[[eq.(S1)]]
      ]
      
      
      set T_bl a_Tbl * Sweight +  b_Tbl ; [[eq. (S3)]]
      
                                  ;-------------------------------find seal contamination in appropriate list------------
      
      if  year   <  1986  [  set  C_Seal  item  SA  seal1986  ]
      if  year   =  1986  [  set  C_Seal  item  SA  seal1986  ]
      if  year   =  1987  [  set  C_Seal  item  SA  seal1987  ]
      if  year   =  1988  [  set  C_Seal  item  SA  seal1988  ]
      if  year   =  1989  [  set  C_Seal  item  SA  seal1989  ]
      if  year   =  1990  [  set  C_Seal  item  SA  seal1990  ]
      if  year   =  1991  [  set  C_Seal  item  SA  seal1991  ]
      if  year   =  1992  [  set  C_Seal  item  SA  seal1992  ]
      if  year   =  1993  [  set  C_Seal  item  SA  seal1993  ]
      if  year   =  1994  [  set  C_Seal  item  SA  seal1994  ]
      if  year   =  1995  [  set  C_Seal  item  SA  seal1995  ]
      if  year   =  1996  [  set  C_Seal  item  SA  seal1996  ]
      if  year   =  1997  [  set  C_Seal  item  SA  seal1997  ]
      if  year   =  1998  [  set  C_Seal  item  SA  seal1998  ]
      if  year   =  1999  [  set  C_Seal  item  SA  seal1999  ]
      if  year   =  2000  [  set  C_Seal  item  SA  seal2000  ]
      if  year   =  2001  [  set  C_Seal  item  SA  seal2001  ]
      if  year   =  2002  [  set  C_Seal  item  SA  seal2002  ]
      if  year   =  2003  [  set  C_Seal  item  SA  seal2003  ]
      if  year   =  2004  [  set  C_Seal  item  SA  seal2004  ]
      if  year   =  2005  [  set  C_Seal  item  SA  seal2005  ]
      if  year   =  2006  [  set  C_Seal  item  SA  seal2006  ]
      if  year   =  2007  [  set  C_Seal  item  SA  seal2007  ]
      if  year   =  2008  [  set  C_Seal  item  SA  seal2008  ]
      if  year   =  2009  [  set  C_Seal  item  SA  seal2009  ]
      
      ;------------------------------contamination in all body of the seal----------- 
      
      set Ic Ic + T_bl * C_Seal * 1000 ; calc. contamination in this seal [ng]; [[eq.(S9)]]
      
      set G T_bl * Es * 1000 ;calc. energy gained of this seal when Es = 37,8 kJ/g ; [[eq. (S10)]]
      
      set energy energy - G ; reduce energy minus energy gained from seal
      
                  
      if energy < ( kappa * 90000 ) 
      [
        set BB BB + (Ic * AA ) 
        stop
      ]
    ]  ; loop
  ]  ; if energy demand "energy" < kappa * 90000
     ;this condition set as one half of energetic contribution of one 45 kg seal prevents bears from overeating in case last of the cought seals is much larger than what is left of their energy needs to cover  
     ; Stirling and mcEwan 1975
     
end


;---------------------------------LactationTransfer-------------------------------------

to LactationTransfer
  if sex = 1 
  [
    if status = 1 
    [
      let C BB / ((weight + Wpf)/ 2 * (fat + Fpf)/ 2 * 1000) ; [[eq.(S11)]]
      
      set BB BB -  (days1 + days2) * mcc * FmilkC * rho * C  ; [[eq. (S14)]]
      
      if ofno != 0 
      [ 
        set  BBc  365 * mcc * FmilkC * rho * Ac * C ;[[eq.(S15)]]
      ]  
    ]  ; 0.496 - daily milk consumption, 0.275..fat percent, 0.67...ratio of contaminants in milk/mother, 
       
    
    if status = 2 
    [
      let C BB / (weight * fat * 1000) ; [[eq. (S13)]]
      
      set BB BB -  (days1 + days2) * mcy * FmilkY * rho * C ;[[eq.(S12)]]
      
      if ofno != 0 
      [ 
        set BBy  BBy + (epsilon * Ic * Ay + 365 * mcy * FmilkY * rho * Ay * C ) ; [[eq.(S16)]]
    ]  ; 
  ]]
end


;-----------------------------------------DIE AND BREED------------------------------------------------
to PopulationDynamics
  if age > 30 [die] 
  
  set RN random-float 1 
  
  ;WHO DIES THIS YEAR
  
  if sex = 0 
  [ 
    ifelse age < 5 
    [
      set death mu_sm 
    ]
    [
      set death mu_m 
    ]  
    if RN < death [die]
  ] 
 
  if sex = 1 
  [ 
    ifelse age < 5 
    [
      set death mu_sf
    ]
    [
      set death mu_f
    ]  if RN < death [die]
  ]
  
  ; BREED NEW INDIVIDUALS    
  if sex = 1 and status = 2 and ofno > 0 
  [
    set status 0 
    set p 0   
    hatch ofno    
    [
      set age 1  
      set BB BBy 
      set BBc 0 
      set BBy 0 
      set sex random 2 
      set color green 
      fd random 10 
      rt random 50 
      set p 0 
      set ofno 0  
      set days1 0 
      set days2 0 
      ifelse sex = 0 
      [
        set status 5
      ] 
      [
        set status 0
      ] 

      
    ]
  ]
  
  ; UPDATE STATUS VALID FOR NEXT YEAR
  ifelse sex = 0 
  [
    set status 5
  ] 
  [
    if status = 0 and p = 0 
    [
      set ofno 0 
      set BBc 0 
      set BBy 0
    ]
 
    if status = 2 and p = 1 
    [ 
      set status 1 
      set RN random-float 1 
      ifelse RN < pi_1cub 
      [
        set ofno 1 
      ]
      [
        set ofno 2
      ]
    ]
      
    if status = 2 and ofno = 0  and p = 0 
    [ 
      set status 0
    ]
      
    if status = 1 and ofno = 0  and p = 0 
    [ 
      set status 0
    ] 
      
    if status = 1 and ofno != 0 
    [ 
      set status 2 
      set BBy BBc 
      set BBc 0
    ] 
      
    if status = 1 and p = 1 
    [ 
      set status 1 
      set p 0 
      set RN random-float 1 
      ifelse RN < pi_1cub  
      [
        set ofno 1 
      ]
      [
        set ofno 2
      ]
    ]
    
    if status = 0 and p = 1 
    [ 
      set status 1 
      set p 0 
      set RN random-float 1 
      ifelse RN < pi_1cub 
      [
        set ofno 1 
      ]
      [
        set ofno 2
      ]
    ]
  ]
  
end


;----------------------------------------------------UPDATE AGE------------------------------------
   
to UpdateAge
  
  ;UPDATE AGE
  set age age + 1  
  set color scale-color red age 0 30 
  if age = 2 
  [
    set color green
  ] 
  
  ; UPDATE COUNTERS
  set energy 0;
  set Ic 0
  set days1 0
  set days2 0
  set Ey 0
  set epsilon 0
  
end


;-----------------------------------------------UPDATE BLUBBER-------------------------------

to UpdateBlubber ; proportion of fat on a polar bear

 ask turtles with  [status = 0] [set fat Ff] ;females without offspring

 ask turtles with  [p = 1 ] [set fat Fpf]    ;pregnant females

 ask turtles with  [status = 1] [set fat Ffcub];females with cubs

 ask turtles with  [status = 2] [set fat Ffyrl] ;females with yearlings
 
 ask turtles with  [sex = 0] [set fat Fm]    ;males
 
   
end


;------------------------------------------------------UPDATE WEIGHT--------------------------------

to UpdateWeight
  ask turtles
  [
    ifelse sex = 0;male=0
    
    [ 
      set weight Wbm * ( 1 - exp(-  kbm * ( age - Abm ))) ^ 3;[[(eq.S17)]]
    ]
    [
      set weight Wbf * ( 1 - exp(- kbf * ( age - Abf))) ^ 3 ;[[(eq.S17)]]
    ]
    
    if sex = 1 and p = 1 
    [ 
      set weight Wpf 
    ]
    
    if sex = 1 and status = 1 
    [
      set weight Wfc 
    ]
  ]
end


;;---------------------------------------------------------FILE SETUP---------------------------------------
;to file-setup
;    
;    set outfile (word year ".txt")
;    file-open outfile
;    file-print ("year age sex C BB lambda") ; header line (space-separated).
;end
;
;
;;--------------------------------------------------------FILE WRITE LINE-----------------------------
;to file-write-line
;   file-open outfile 
;
;   
;    
;    file-write year ; 
;    file-write age
;    file-write sex
;    let C BB / (weight * fat * 1000)  file-write C
;  
;    file-write BB 
;    file-write lambda
;    file-print ""    
;  
;  file-close
;end
@#$#@#$#@
GRAPHICS-WINDOW
210
10
649
470
16
16
13.0
1
10
1
1
1
0
1
1
1
-16
16
-16
16
0
0
1
ticks

BUTTON
57
67
124
100
NIL
setup
NIL
1
T
OBSERVER
NIL
NIL
NIL
NIL

BUTTON
47
166
134
227
NIL
go
T
1
T
OBSERVER
NIL
NIL
NIL
NIL

MONITOR
802
110
885
155
NIL
count turtles
17
1
11

@#$#@#$#@
 Model version: SUB2_1 updatedparamentrs
; 
Manuscript authors: Viola Pavlova, Jacob Nabe-Nielsen, Rune Dietz, Jens-Christian Svenning, Katrin Vorkamp, Frank Farso Riget, Volker Grimm, Sonne Christian, Letcher Robert
;
; created 1.10.2012  in NetLogo 4.1
; updated 10.3.2013 :  Volker in Net Logo 5.0.3
; updated 20.03.2013 and 01.05.2013:  Viola
; updated 18.1.2014:  Viola in NetLogo 4.1.3
; updated 19.3.2014:  Viola in NetLogo 4.1.3


Polar bear population model

for description see ODD protocol in Pavlova et al. () FIELD METABOLIC RATE AND PCB ADIPOSE TISSUE DEPOSITION EFFICIENCY IN EAST GREENLAND POLAR BEARS DERIVED FROM CONTAMINANT MONITORING DATA


@#$#@#$#@
default
true
0
Polygon -7500403 true true 150 5 40 250 150 205 260 250

airplane
true
0
Polygon -7500403 true true 150 0 135 15 120 60 120 105 15 165 15 195 120 180 135 240 105 270 120 285 150 270 180 285 210 270 165 240 180 180 285 195 285 165 180 105 180 60 165 15

arrow
true
0
Polygon -7500403 true true 150 0 0 150 105 150 105 293 195 293 195 150 300 150

box
false
0
Polygon -7500403 true true 150 285 285 225 285 75 150 135
Polygon -7500403 true true 150 135 15 75 150 15 285 75
Polygon -7500403 true true 15 75 15 225 150 285 150 135
Line -16777216 false 150 285 150 135
Line -16777216 false 150 135 15 75
Line -16777216 false 150 135 285 75

bug
true
0
Circle -7500403 true true 96 182 108
Circle -7500403 true true 110 127 80
Circle -7500403 true true 110 75 80
Line -7500403 true 150 100 80 30
Line -7500403 true 150 100 220 30

butterfly
true
0
Polygon -7500403 true true 150 165 209 199 225 225 225 255 195 270 165 255 150 240
Polygon -7500403 true true 150 165 89 198 75 225 75 255 105 270 135 255 150 240
Polygon -7500403 true true 139 148 100 105 55 90 25 90 10 105 10 135 25 180 40 195 85 194 139 163
Polygon -7500403 true true 162 150 200 105 245 90 275 90 290 105 290 135 275 180 260 195 215 195 162 165
Polygon -16777216 true false 150 255 135 225 120 150 135 120 150 105 165 120 180 150 165 225
Circle -16777216 true false 135 90 30
Line -16777216 false 150 105 195 60
Line -16777216 false 150 105 105 60

car
false
0
Polygon -7500403 true true 300 180 279 164 261 144 240 135 226 132 213 106 203 84 185 63 159 50 135 50 75 60 0 150 0 165 0 225 300 225 300 180
Circle -16777216 true false 180 180 90
Circle -16777216 true false 30 180 90
Polygon -16777216 true false 162 80 132 78 134 135 209 135 194 105 189 96 180 89
Circle -7500403 true true 47 195 58
Circle -7500403 true true 195 195 58

circle
false
0
Circle -7500403 true true 0 0 300

circle 2
false
0
Circle -7500403 true true 0 0 300
Circle -16777216 true false 30 30 240

cow
false
0
Polygon -7500403 true true 200 193 197 249 179 249 177 196 166 187 140 189 93 191 78 179 72 211 49 209 48 181 37 149 25 120 25 89 45 72 103 84 179 75 198 76 252 64 272 81 293 103 285 121 255 121 242 118 224 167
Polygon -7500403 true true 73 210 86 251 62 249 48 208
Polygon -7500403 true true 25 114 16 195 9 204 23 213 25 200 39 123

cylinder
false
0
Circle -7500403 true true 0 0 300

dot
false
0
Circle -7500403 true true 90 90 120

face happy
false
0
Circle -7500403 true true 8 8 285
Circle -16777216 true false 60 75 60
Circle -16777216 true false 180 75 60
Polygon -16777216 true false 150 255 90 239 62 213 47 191 67 179 90 203 109 218 150 225 192 218 210 203 227 181 251 194 236 217 212 240

face neutral
false
0
Circle -7500403 true true 8 7 285
Circle -16777216 true false 60 75 60
Circle -16777216 true false 180 75 60
Rectangle -16777216 true false 60 195 240 225

face sad
false
0
Circle -7500403 true true 8 8 285
Circle -16777216 true false 60 75 60
Circle -16777216 true false 180 75 60
Polygon -16777216 true false 150 168 90 184 62 210 47 232 67 244 90 220 109 205 150 198 192 205 210 220 227 242 251 229 236 206 212 183

fish
false
0
Polygon -1 true false 44 131 21 87 15 86 0 120 15 150 0 180 13 214 20 212 45 166
Polygon -1 true false 135 195 119 235 95 218 76 210 46 204 60 165
Polygon -1 true false 75 45 83 77 71 103 86 114 166 78 135 60
Polygon -7500403 true true 30 136 151 77 226 81 280 119 292 146 292 160 287 170 270 195 195 210 151 212 30 166
Circle -16777216 true false 215 106 30

flag
false
0
Rectangle -7500403 true true 60 15 75 300
Polygon -7500403 true true 90 150 270 90 90 30
Line -7500403 true 75 135 90 135
Line -7500403 true 75 45 90 45

flower
false
0
Polygon -10899396 true false 135 120 165 165 180 210 180 240 150 300 165 300 195 240 195 195 165 135
Circle -7500403 true true 85 132 38
Circle -7500403 true true 130 147 38
Circle -7500403 true true 192 85 38
Circle -7500403 true true 85 40 38
Circle -7500403 true true 177 40 38
Circle -7500403 true true 177 132 38
Circle -7500403 true true 70 85 38
Circle -7500403 true true 130 25 38
Circle -7500403 true true 96 51 108
Circle -16777216 true false 113 68 74
Polygon -10899396 true false 189 233 219 188 249 173 279 188 234 218
Polygon -10899396 true false 180 255 150 210 105 210 75 240 135 240

house
false
0
Rectangle -7500403 true true 45 120 255 285
Rectangle -16777216 true false 120 210 180 285
Polygon -7500403 true true 15 120 150 15 285 120
Line -16777216 false 30 120 270 120

leaf
false
0
Polygon -7500403 true true 150 210 135 195 120 210 60 210 30 195 60 180 60 165 15 135 30 120 15 105 40 104 45 90 60 90 90 105 105 120 120 120 105 60 120 60 135 30 150 15 165 30 180 60 195 60 180 120 195 120 210 105 240 90 255 90 263 104 285 105 270 120 285 135 240 165 240 180 270 195 240 210 180 210 165 195
Polygon -7500403 true true 135 195 135 240 120 255 105 255 105 285 135 285 165 240 165 195

line
true
0
Line -7500403 true 150 0 150 300

line half
true
0
Line -7500403 true 150 0 150 150

pentagon
false
0
Polygon -7500403 true true 150 15 15 120 60 285 240 285 285 120

person
false
0
Circle -7500403 true true 110 5 80
Polygon -7500403 true true 105 90 120 195 90 285 105 300 135 300 150 225 165 300 195 300 210 285 180 195 195 90
Rectangle -7500403 true true 127 79 172 94
Polygon -7500403 true true 195 90 240 150 225 180 165 105
Polygon -7500403 true true 105 90 60 150 75 180 135 105

plant
false
0
Rectangle -7500403 true true 135 90 165 300
Polygon -7500403 true true 135 255 90 210 45 195 75 255 135 285
Polygon -7500403 true true 165 255 210 210 255 195 225 255 165 285
Polygon -7500403 true true 135 180 90 135 45 120 75 180 135 210
Polygon -7500403 true true 165 180 165 210 225 180 255 120 210 135
Polygon -7500403 true true 135 105 90 60 45 45 75 105 135 135
Polygon -7500403 true true 165 105 165 135 225 105 255 45 210 60
Polygon -7500403 true true 135 90 120 45 150 15 180 45 165 90

sheep
false
0
Rectangle -7500403 true true 151 225 180 285
Rectangle -7500403 true true 47 225 75 285
Rectangle -7500403 true true 15 75 210 225
Circle -7500403 true true 135 75 150
Circle -16777216 true false 165 76 116

square
false
0
Rectangle -7500403 true true 30 30 270 270

square 2
false
0
Rectangle -7500403 true true 30 30 270 270
Rectangle -16777216 true false 60 60 240 240

star
false
0
Polygon -7500403 true true 151 1 185 108 298 108 207 175 242 282 151 216 59 282 94 175 3 108 116 108

target
false
0
Circle -7500403 true true 0 0 300
Circle -16777216 true false 30 30 240
Circle -7500403 true true 60 60 180
Circle -16777216 true false 90 90 120
Circle -7500403 true true 120 120 60

tree
false
0
Circle -7500403 true true 118 3 94
Rectangle -6459832 true false 120 195 180 300
Circle -7500403 true true 65 21 108
Circle -7500403 true true 116 41 127
Circle -7500403 true true 45 90 120
Circle -7500403 true true 104 74 152

triangle
false
0
Polygon -7500403 true true 150 30 15 255 285 255

triangle 2
false
0
Polygon -7500403 true true 150 30 15 255 285 255
Polygon -16777216 true false 151 99 225 223 75 224

truck
false
0
Rectangle -7500403 true true 4 45 195 187
Polygon -7500403 true true 296 193 296 150 259 134 244 104 208 104 207 194
Rectangle -1 true false 195 60 195 105
Polygon -16777216 true false 238 112 252 141 219 141 218 112
Circle -16777216 true false 234 174 42
Rectangle -7500403 true true 181 185 214 194
Circle -16777216 true false 144 174 42
Circle -16777216 true false 24 174 42
Circle -7500403 false true 24 174 42
Circle -7500403 false true 144 174 42
Circle -7500403 false true 234 174 42

turtle
true
0
Polygon -10899396 true false 215 204 240 233 246 254 228 266 215 252 193 210
Polygon -10899396 true false 195 90 225 75 245 75 260 89 269 108 261 124 240 105 225 105 210 105
Polygon -10899396 true false 105 90 75 75 55 75 40 89 31 108 39 124 60 105 75 105 90 105
Polygon -10899396 true false 132 85 134 64 107 51 108 17 150 2 192 18 192 52 169 65 172 87
Polygon -10899396 true false 85 204 60 233 54 254 72 266 85 252 107 210
Polygon -7500403 true true 119 75 179 75 209 101 224 135 220 225 175 261 128 261 81 224 74 135 88 99

wheel
false
0
Circle -7500403 true true 3 3 294
Circle -16777216 true false 30 30 240
Line -7500403 true 150 285 150 15
Line -7500403 true 15 150 285 150
Circle -7500403 true true 120 120 60
Line -7500403 true 216 40 79 269
Line -7500403 true 40 84 269 221
Line -7500403 true 40 216 269 79
Line -7500403 true 84 40 221 269

x
false
0
Polygon -7500403 true true 270 75 225 30 30 225 75 270
Polygon -7500403 true true 30 75 75 30 270 225 225 270

@#$#@#$#@
NetLogo 4.1
@#$#@#$#@
@#$#@#$#@
@#$#@#$#@
@#$#@#$#@
@#$#@#$#@
default
0.0
-0.2 0 1.0 0.0
0.0 1 1.0 0.0
0.2 0 1.0 0.0
link direction
true
0
Line -7500403 true 150 150 90 180
Line -7500403 true 150 150 210 180

@#$#@#$#@
0
@#$#@#$#@
